# Supplementary material for: Rebound of shelf water salinity in the Ross Sea
Source: PubMed Central journal article supplement (PMC6884573; doi:10.1038/s41467-019-13083-8), 2019-11-29
Supplement: 41467_2019_13083_MOESM1_ESM.pdf [file 41467_2019_13083_MOESM1_ESM.pdf]

1        **Supplementary Information**  
2        **“Rebound of shelf water salinity in the Ross Sea”**  
3        **By P. Castagno et al.**  
4  
5  
6  
7  
8  
9  
10  
11  
12  
13  
14  
15  
16  
17  
18  
19  
20  
21  
22  
23  
24  
25  
26  
27  
28  
29  
30  
31  
32

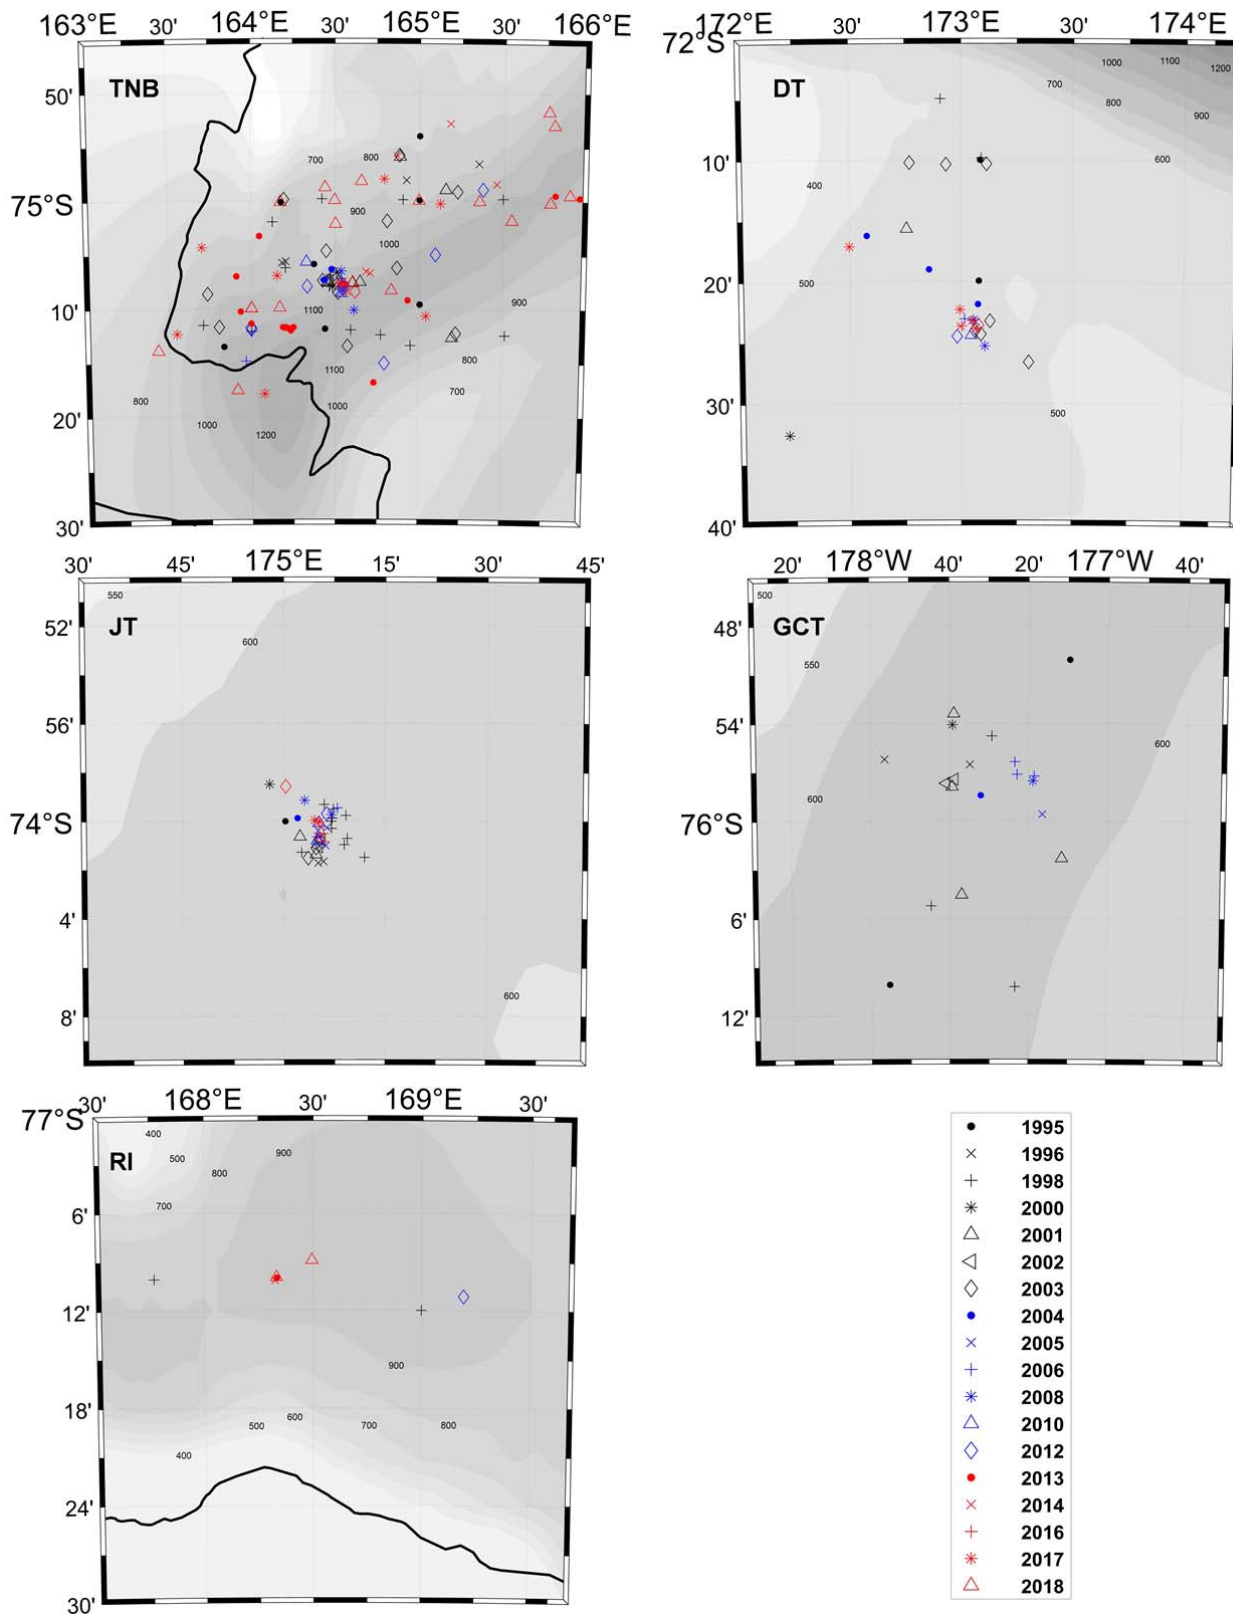

33 **Supplementary Figure 1.** Location of the CTD casts used for each study area: Terra Nova Bay  
 34 (TNB); Drygalski Trough mouth (DT); Ross Island depression (RI); Joides Trough (JT); and Glomar  
 35 Challenger Trough (GCT). The bold line in TNB and RI is the ice outline.

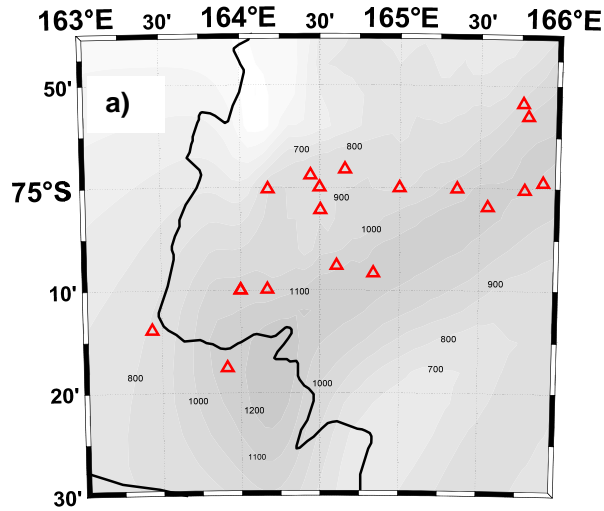

36

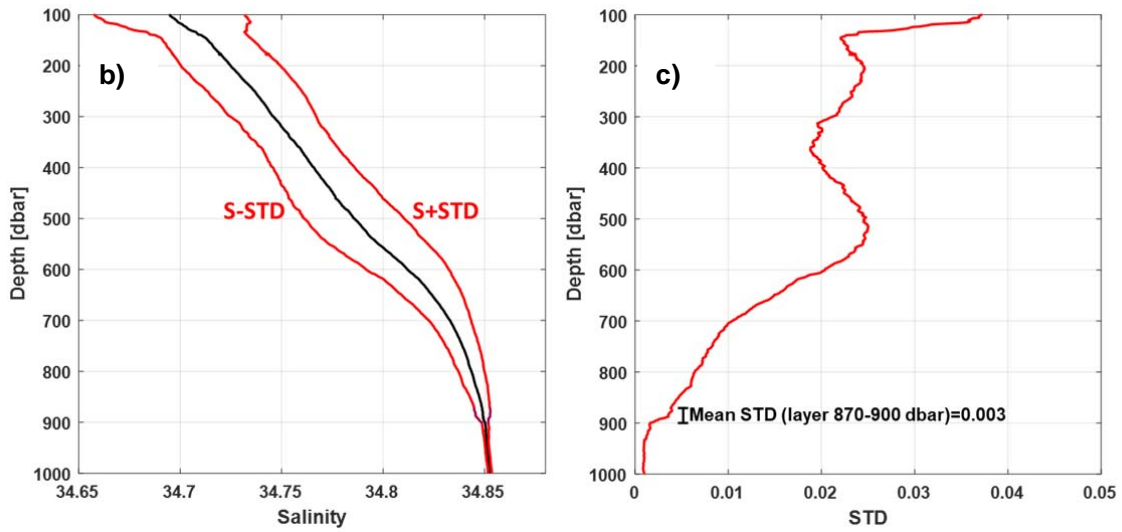

37

38 **Supplementary Figure 2.** a) Map of the CTD casts in the TNB region in 2018, b) mean salinity profile  
 39 (black line) of the 2018 casts with  $\pm$  the one standard deviation (STD, red lines) evaluated on pressure  
 40 surfaces, c) standard deviation (red line) profile obtained for each pressure surface of 1 dbar.

41

42

43

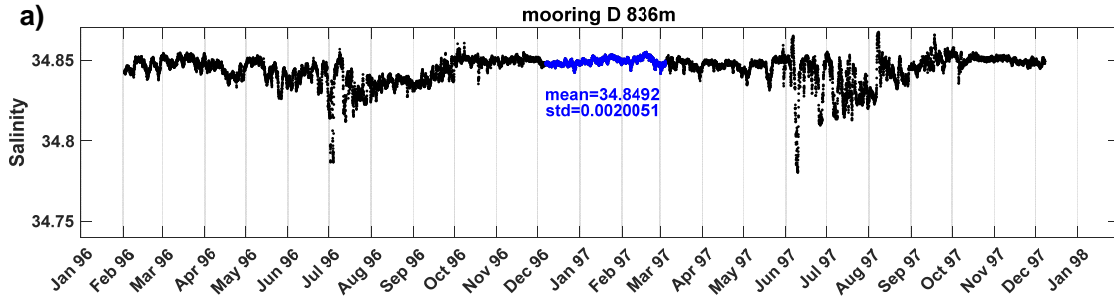

44

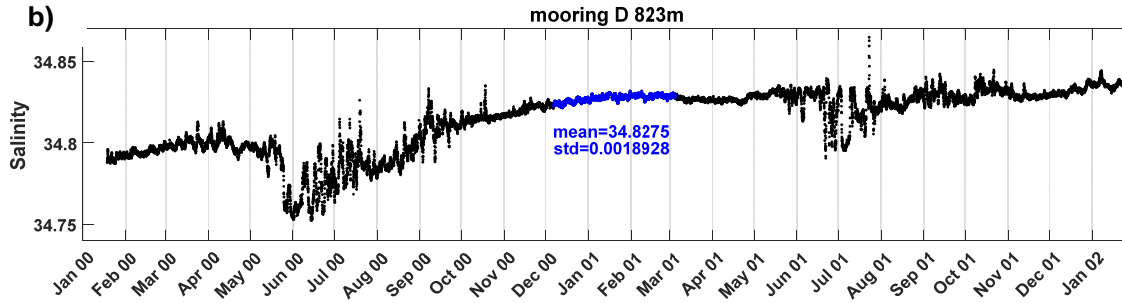

45

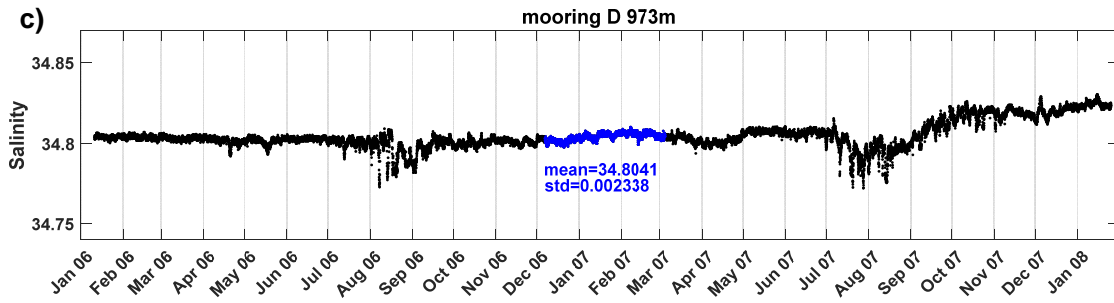

46

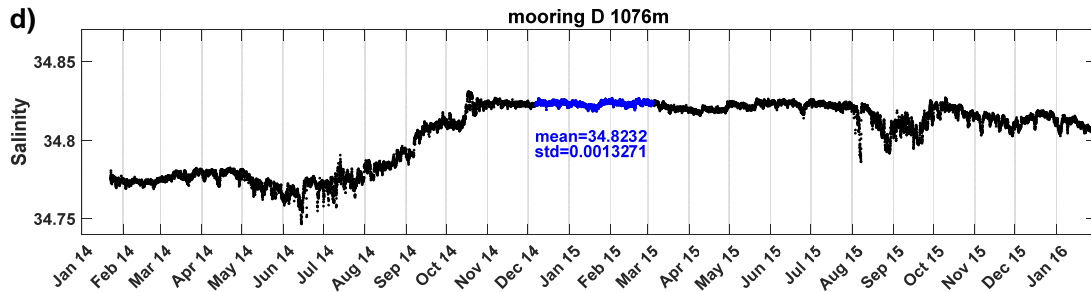

47

48 **Supplementary Figure 3.** Time series of HSSW salinity in TNB. Near-bottom salinity measured at  
 49 mooring D of the MORSea project in the centre of TNB (75.14°S, 164.55°E) at depths of a) 836m  
 50 from February 1996 to December 1997, b) 823 m from January 2000 to February 2002, c) 973m from  
 51 January 2006 to January 2008, and d) 1076 m from January 2014 to February 2016.

52

53

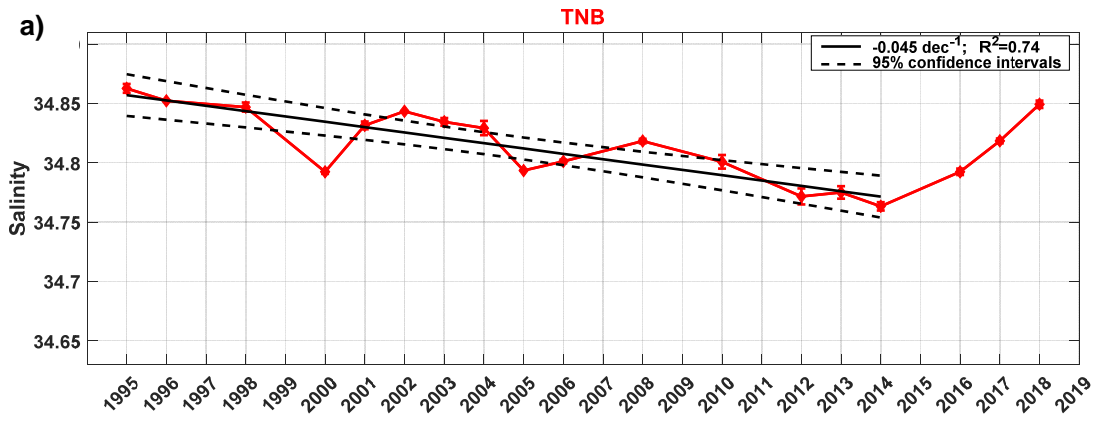

54

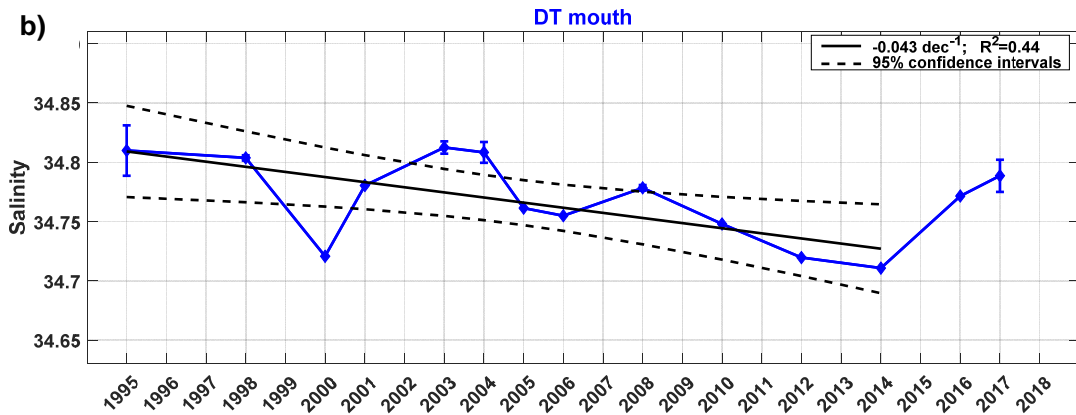

55

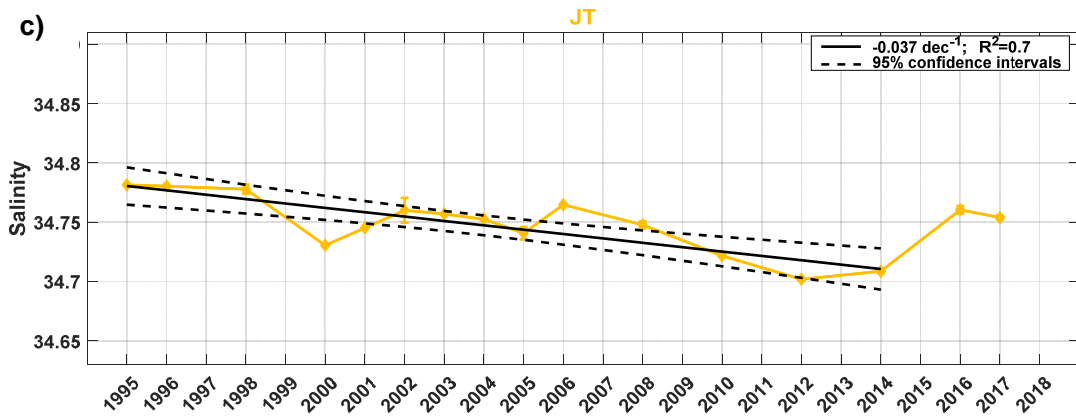

56

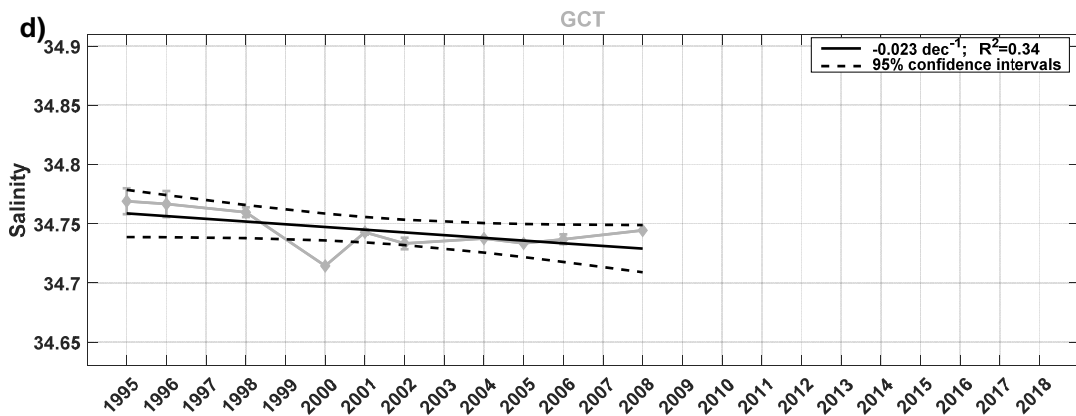

57

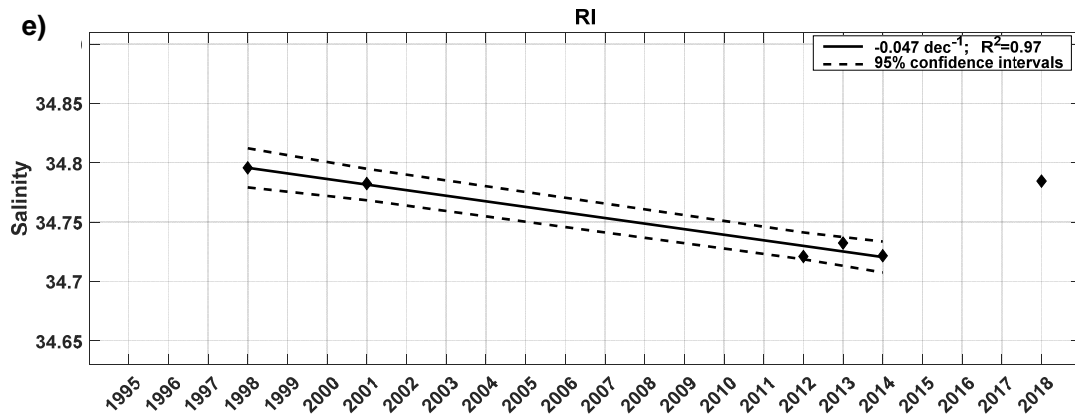

58

59 **Supplementary Figure 4.** Salinity time series from Fig. 2 with linear trends. Trend lines show  
 60 regressions of salinity change per decade from 1995 to 2014, with the coefficient of determination and  
 61 the 95% confidence interval, for a) TNB (trend significant at 99% level), b) DT mouth (trend significant  
 62 at 98% level), c) JT (trend significant at 99% level), d) GCT (trend not statistically significant), and e)  
 63 RI (trend not statistically significant).

64

65

66

67

68

69

70

71

72

73

74

75

76

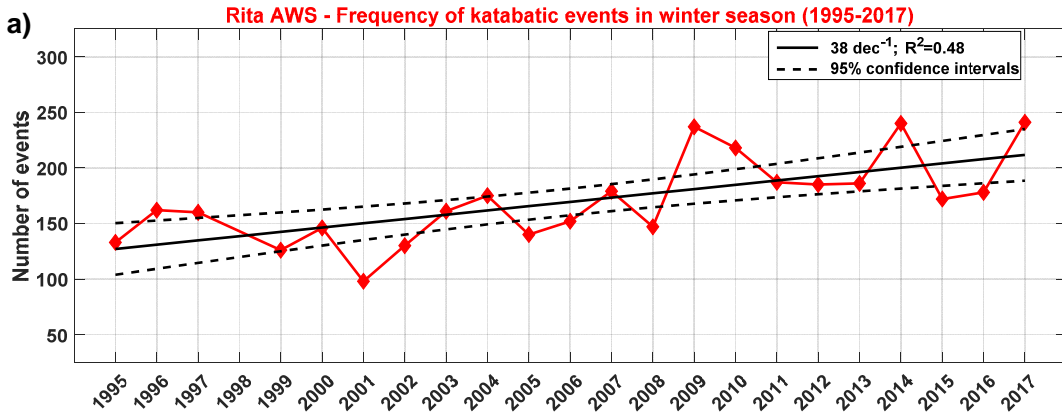

77

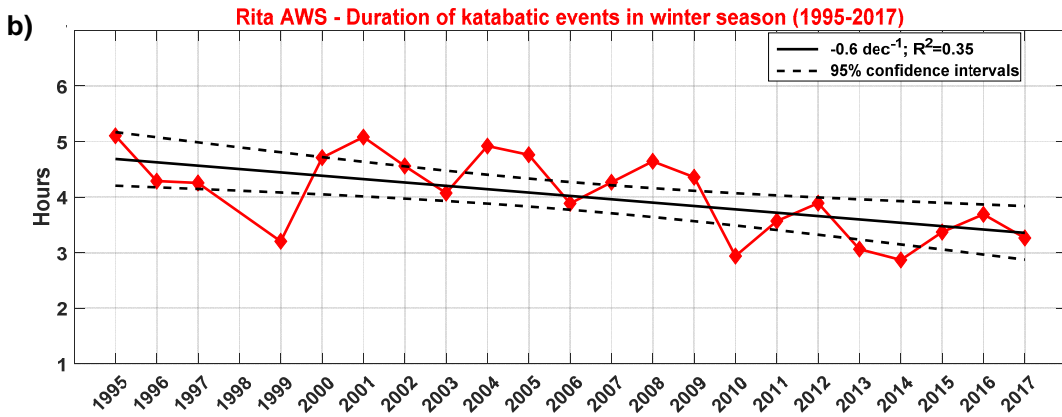

78

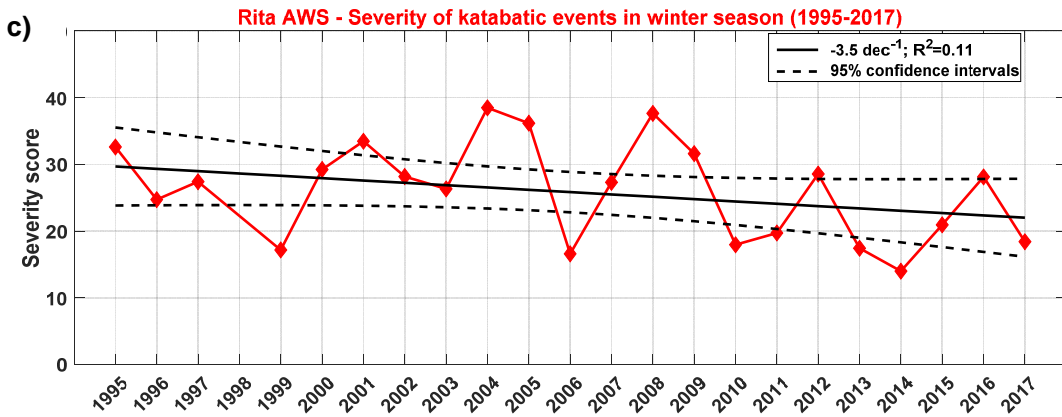

79

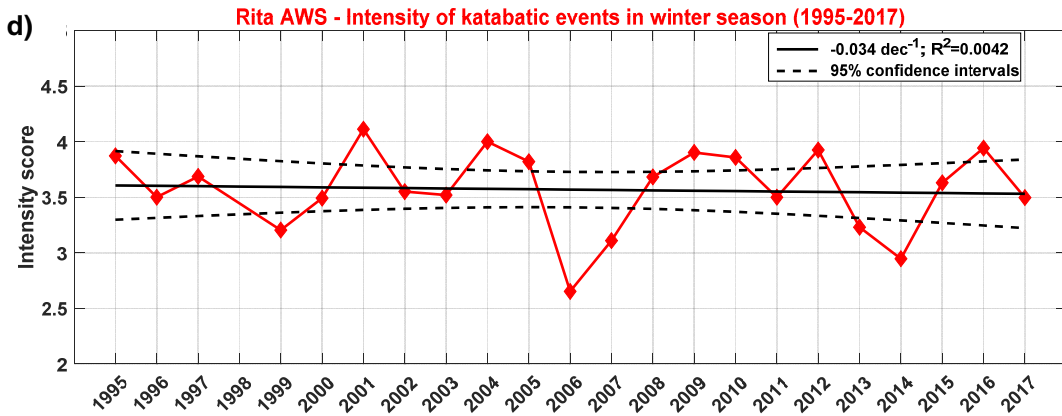

80

81 **Supplementary Figure 5.** Changes in katabatic winds at TNB, 1995 to 2017. Time series with linear  
 82 regressions of change per decade from 1995 to 2017, coefficient of determination and the 95%  
 83 confidence interval for a) katabatic events frequency, (trend significant at 99% level), b) duration  
 84 (trend significant at 99% level), c) severity (trend not statistically significant), and d) intensity (trend  
 85 not statistically significant). The time series have been obtained by analysing the wind data collected  
 86 by Rita AWS during the winter season (April to October).

87

88

89 **Supplementary Tables**

90

| Study area | Year | Number of profiles averaged | First CTD profile | Last CTD profile |
|------------|------|-----------------------------|-------------------|------------------|
| TNB        | 1995 | 7                           | 19/02/1995        | 20/02/1995       |
| TNB        | 1996 | 4                           | 14/01/1996        | 05/02/1996       |
| TNB        | 1998 | 13                          | 07/12/1997        | 22/02/1998       |
| TNB        | 2000 | 2                           | 16/01/2000        | 18/01/2000       |
| TNB        | 2001 | 9                           | 17/01/2001        | 19/01/2001       |
| TNB        | 2002 | 2                           | 31/01/2002        | 03/02/2002       |
| TNB        | 2003 | 13                          | 17/01/2003        | 27/01/2003       |
| TNB        | 2004 | 2                           | 05/01/2004        | 27/01/2004       |
| TNB        | 2005 | 1                           | 15/01/2005        |                  |
| TNB        | 2006 | 4                           | 08/01/2006        | 16/01/2006       |
| TNB        | 2008 | 3                           | 25/01/2008        | 01/02/2008       |
| TNB        | 2010 | 2                           | 03/02/2010        | 06/02/2010       |
| TNB        | 2012 | 8                           | 23/01/2012        | 09/02/2012       |
| TNB        | 2013 | 18                          | 14/02/2013        | 05/03/2013       |
| TNB        | 2014 | 6                           | 11/01/2014        | 27/01/2014       |
| TNB        | 2016 | 2                           | 31/01/2016        | 06/02/2016       |
| TNB        | 2017 | 9                           | 08/01/2017        | 11/02/2017       |
| TNB        | 2018 | 19                          | 09/01/2018        | 17/02/2018       |
| DT         | 1995 | 2                           | 12/02/1995        | 12/02/1995       |
| DT         | 1998 | 2                           | 26/12/1997        | 27/12/1997       |
| DT         | 2000 | 1                           | 27/01/2000        |                  |
| DT         | 2001 | 1                           | 28/01/2001        |                  |
| DT         | 2003 | 7                           | 06/02/2003        | 07/02/2003       |
| DT         | 2004 | 3                           | 25/02/2004        | 26/02/2004       |
| DT         | 2005 | 1                           | 19/01/2005        |                  |
| DT         | 2006 | 1                           | 29/01/2006        |                  |
| DT         | 2008 | 2                           | 27/01/2008        | 04/02/2008       |
| DT         | 2010 | 1                           | 30/01/2010        |                  |
| DT         | 2012 | 1                           | 26/01/2012        |                  |
| DT         | 2014 | 1                           | 22/01/2014        |                  |



|     |      |    |            |            |
|-----|------|----|------------|------------|
| DT  | 2016 | 1  | 28/01/2016 |            |
| DT  | 2017 | 4  | 04/02/2017 | 09/02/2017 |
|     |      |    |            |            |
| JT  | 1995 | 1  | 15/02/1995 |            |
| JT  | 1996 | 2  | 13/01/1996 | 26/01/1996 |
| JT  | 1998 | 10 | 16/12/1997 | 11/02/1998 |
| JT  | 2000 | 1  | 15/01/2000 |            |
| JT  | 2001 | 2  | 20/01/2001 | 21/01/2001 |
| JT  | 2002 | 2  | 30/01/2002 | 07/02/2002 |
| JT  | 2003 | 3  | 05/02/2003 | 05/02/2003 |
| JT  | 2004 | 1  | 13/01/2004 |            |
| JT  | 2005 | 3  | 29/01/2005 | 02/02/2005 |
| JT  | 2006 | 2  | 27/01/2006 | 28/01/2006 |
| JT  | 2008 | 2  | 27/01/2008 | 03/02/2008 |
| JT  | 2010 | 2  | 31/01/2010 | 11/02/2010 |
| JT  | 2012 | 2  | 27/01/2012 | 28/01/2008 |
| JT  | 2014 | 2  | 06/01/2014 | 30/01/2014 |
| JT  | 2016 | 2  | 24/01/2016 | 27/01/2016 |
| JT  | 2017 | 2  | 17/01/2017 | 30/01/2017 |
|     |      |    |            |            |
| GCT | 1995 | 4  | 01/02/1995 | 02/02/1995 |
| GCT | 1996 | 2  | 23/01/1996 | 23/01/1996 |
| GCT | 1998 | 3  | 13/12/1997 | 13/12/1997 |
| GCT | 2000 | 1  | 22/01/2000 |            |
| GCT | 2001 | 4  | 11/02/2001 | 12/02/2001 |
| GCT | 2002 | 2  | 21/01/2002 | 29/01/2002 |
| GCT | 2004 | 1  | 08/01/2004 |            |
| GCT | 2005 | 1  | 31/01/2005 |            |
| GCT | 2006 | 3  | 21/01/2006 | 21/01/2006 |
| GCT | 2008 | 1  | 28/01/2008 |            |
|     |      |    |            |            |
| RI  | 1998 | 2  | 29/01/1998 | 29/01/1998 |
| RI  | 2001 | 1  | 31/01/2001 |            |
| RI  | 2012 | 1  | 05/02/2012 |            |
| RI  | 2013 | 1  | 12/02/2013 |            |
| RI  | 2014 | 1  | 01/02/2014 |            |
| RI  | 2018 | 2  | 23/01/2018 | 23/01/2018 |

91

92 **Supplementary Table 1.** Summary of the number and date of CTD profiles used to construct the  
93 austral summer average in reach region.

94

95

96

97

## 98 **Supplementary Discussion**

99 In order to evaluate the impact of katabatic wind forcing in TNB on the variability of  
100 HSSW salinity, we analysed wind speed and direction recorded by Automatic  
101 Weather Station (AWS) Rita between 1995 and 2017, with a time resolution of one  
102 hour.

103 Rita is part of the PNRA meteo-climatological observatory and is considered the  
104 most representative AWS site of the atmospheric conditions upstream of Terra Nova  
105 Bay polynya<sup>1</sup>.

106 To identify a katabatic event, we defined an objective criterion based on the analysis  
107 of the wind rose diagram and of wind class frequency distribution: an event occurs  
108 when the wind speed is equal or greater than the 90th percentile level for at least  
109 one hour (for the investigated study period,  $22.1 \text{ m s}^{-1}$ ) and the wind direction is  
110 between  $225^\circ$  and  $360^\circ$ . We considered only katabatic events in winter (April to  
111 October), when HSSW is produced. The katabatic wind events were characterized  
112 by frequency (number of katabatic events per year), average duration, severity (sum  
113 of the differences between the measured wind speed and the relative percentile  
114 level) and intensity (ratio between severity and duration). Thus, the severity score  
115 highlights the magnitude of a katabatic event, measured in terms of deviation from  
116 the reference percentile level, while the intensity score provides information about  
117 variability and trends of strong and short events.

118 We found no significant correlation between the time series of HSSW salinity (Fig. 2)  
119 and the four katabatic wind descriptors (Fig. S5). Furthermore, we observe an  
120 opposite behavior of the frequency and duration time series. The first exhibit a  
121 positive trend ( $+38 \text{ events dec}^{-1}$ , significant at 95% level), whereas, the duration  
122 shows a negative trend ( $-0.7 \text{ h dec}^{-1}$ , significant at 95% level). Moreover, in the  
123 katabatic wind descriptors we do not detect the same fluctuation of 5-10 years  
124 observed in the TNB salinity time series.

125 These results suggest that the salinity trends and fluctuations of the HSSW  
126 measured in TNB from 1995 to 2018 do not depend on the katabatic wind regime in  
127 TNB.

128

## 129 **Supplementary References**

- 130 1. Knuth, S. L. & Cassano, J. J. An analysis of near-surface winds, air  
131 temperature, and cyclone activity in Terra Nova Bay, Antarctica, from 1993 to  
132 2009. *J. Appl. Meteorol. Climatol.* **50**, 662–680 (2011).

133

134

135

136
